# Supplementary material
Source: publisher site journal article supplement (https://www.dovepress.com/article/319622)
Supplement: Supplementary file 1 [file get_supplementary_file.php]

Appendix. Demographic and clinical outcome of study subjects

| **Age** | **Nerves** | **Block Relief (%)** | **2 Week Relief (%)** | **SST (volt)** | **6 Month Relief (%)** | **Relief Duration (months)** |
| --- | --- | --- | --- | --- | --- | --- |
| **27** | Rt L1-5 | 50 | 80 | 0.42 | 60 | 7 |
| **32** | Lt L3-L5 | 60 | 95 | 0.43 | 50 | 6 |
| **39** | Lt L3-5 | 60 | 80 | 0.47 | LTFU | LTFU |
| **40** | Rt L2-5 | 90 | 80 | 0.53 | 50 | 8 |
| **40** | Rt L3-L5 | 80 | 90 | 0.4 | 50 | 6 |
| **41** | Lt L3-L5 | 80 | 75 | 0.37 | 70 | 12 |
| **41** | B/L L3-5 | 70 | 75 | 0.33 | 75 | 12 |
| **42** | Lt L3-5 | 90 | 90 | 0.57 | 50 | 6 |
| **42** | Rt L4-L5 | 90 | 100 | 0.35 | 75 | 7 |
| **43** | Rt L3-5 | 65 | 25 | 0.33 | 25 | 0 |
| **43** | Lt L3-5 | 85 | 60 | 0.3 | 80 | 10 |
| **43** | Rt L3-5 | 60 | 60 | 0.57 | 60 | 11 |
| **43** | Lt L3-5 | 65 | 70 | 0.33 | 70 | 10 |
| **44** | Rt L3-5 | 100 | 40 | 0.5 | 40 | 5 |
| **44** | Rt L2-5 | 75 | 95 | 0.38 | 40 | 4 |
| **44** | Rt L2-5 | 75 | 100 | 0.43 | 25 | 1 |
| **45** | Rt L3-5 | 75 | 85 | 0.4 | 40 | 4 |
| **47** | Lt L2-5 | 65 | 85 | 0.55 | 25 | 5 |
| **47** | Lt L3-5 | 65 | 95 | 0.2 | 80 | 10 |
| **48** | B/L L3-5 | 100 | 100 | 0.57 | 75 | 17 |
| **50** | Rt L3-5 | 60 | 40 | 0.57 | 40 | 0 |
| **50** | Lt L3-5 | 80 | 75 | 0.57 | 40 | 4 |
| **50** | B/L L3-5 | 75 | 75 | 0.33 | 55 | 6 |
| **50** | Rt L3-5 | 80 | 80 | 0.47 | 40 | 5 |
| **50** | B/L L3-5 | 90 | 80 | 0.52 | 50 | 6 |
| **50** | Rt L3-5, Lt L45 | 90 | 90 | 0.38 | 85 | 11 |
| **50** | Rt L3-5 | 60 | 100 | 0.43 | 50 | 6 |
| **50** | Rt L3-5 | 95 | 100 | 0.4 | 75 | 8 |
| **51** | Rt L3-5 | 50 | 35 | 0.57 | 25 | 0 |
| **51** | Rt L2-5 | 55 | 50 | 0.45 | 50 | 6 |
| **51** | Lt L3-5 | 50 | 50 | 0.5 | 50 | 10 |
| **51** | Rt L2-4 | 50 | 90 | 0.33 | 70 | 8 |
| **52** | Lt L3-L5 | 85 | 60 | 0.57 | 30 | 3 |
| **52** | Lt L3-5 | 100 | 80 | 0.43 | 45 | 1 |
| **52** | Rt L3-5 | 80 | 80 | 0.5 | 40 | 5 |
| **54** | Rt L3-5 | 65 | 75 | 0.4 | 50 | 7 |
| **54** | Rt T12-L3 | 80 | 80 | 0.53 | 50 | 6 |
| **54** | Rt T12, L1-4 | 80 | 80 | 0.48 | 80 | 24 |
| **58** | Rt L3-5 | 100 | 35 | 0.43 | 50 | 8 |
| **58** | Lt L3-5 | 100 | 80 | 0.47 | 50 | 7 |
| **59** | Rt L3-5 | 60 | 40 | 0.6 | 0 | 0 |
| **59** | Rt L3-5 | 100 | 60 | 0.5 | 20 | 4 |
| **59** | B/L L3-5 | 90 | 65 | 0.42 | 75 | 20 |
| **59** | Rt L3-L5 | 80 | 80 | 0.47 | 70 | 12 |
| **59** | B/L L3-5 | 80 | 85 | 0.5 | 40 | 4 |
| **62** | Lt L2-5 | 100 | 80 | 0.43 | 75 | 36 |
| **65** | Rt L2-5 | 60 | 75 | 0.38 | 75 | 12 |
| **65** | Lt L3-L5 | 95 | 90 | 0.47 | 90 | 36 |
| **65** | Rt L4-5 | 95 | 100 | 0.45 | 80 | 12 |
| **66** | Lt L2-5 | 90 | 50 | 0.63 | 50 | 6 |
| **66** | Lt L3-5 | 50 | 55 | 0.4 | deceased | deceased |
| **66** | Rt L3-5 | 70 | 60 | 0.47 | 30 | 2 |
| **66** | Rt L3-5 | 80 | 75 | 0.4 | 75 | 11 |
| **66** | Rt L3-L5 | 75 | 75 | 0.47 | LTFU | LTFU |
| **66** | Lt L2-5 | 90 | 90 | 0.58 | 90 | 16 |
| **68** | Lt L3-5 | 100 | 100 | 0.67 | 50 | 6 |
| **69** | Lt L3-5 | 100 | 80 | 0.5 | 50 | 7 |
| **69** | Rt L3-5 | 60 | 80 | 0.33 | 80 | 11 |
| **69** | B/L L2-5 | 60 | 90 | 0.48 | 75 | 9 |
| **69** | B/L L3-5 | 100 | 100 | 0.63 | 40 | 5 |
| **69** | B/L L2-5 | 90 | 100 | 0.56 | 50 | 6 |
| **70** | Rt L2-5 | 90 | 100 | 0.48 | 80 | 11 |
| **73** | Lt L1-3 | 70 | 80 | 0.4 | 80 | 36 |
| **74** | Lt L3-5 | 100 | 100 | 0.5 | 100 | 22 |
| **77** | Rt L3-5 | 100 | 100 | 0.4 | 95 | 12 |
| **85** | Rt L2-5, Lt L3-4 | 80 | 80 | 0.68 | 45 | 2 |
| **85** | Rt L3-L5 | 100 | 80 | 0.37 | 90 | 36 |

Block Relief: the percentage pain relief after diagnostic block; SST: sensory stimulation threshold; 2 Week RFA Relief: the percentage pain relief 2 weeks after denervation; 6 Month Relief: the percentage pain relief 6 months after denervation; Relief Duration: duration of pain relief from the RF denervation; 95% CI: 95% confidence interval. LTFU: lost to follow-up
